# Supplementary figures and images for: Complete metabolic response in patients with advanced non-small cell lung cancer with prolonged response to immune checkpoint inhibitor therapy
Source: PubMed Central journal article supplement — J Immunother Cancer. 2021 Mar 31;9(3):e002262. doi: 10.1136/jitc-2020-002262 (PMC8016096; doi:10.1136/jitc-2020-002262), 2021-03-31

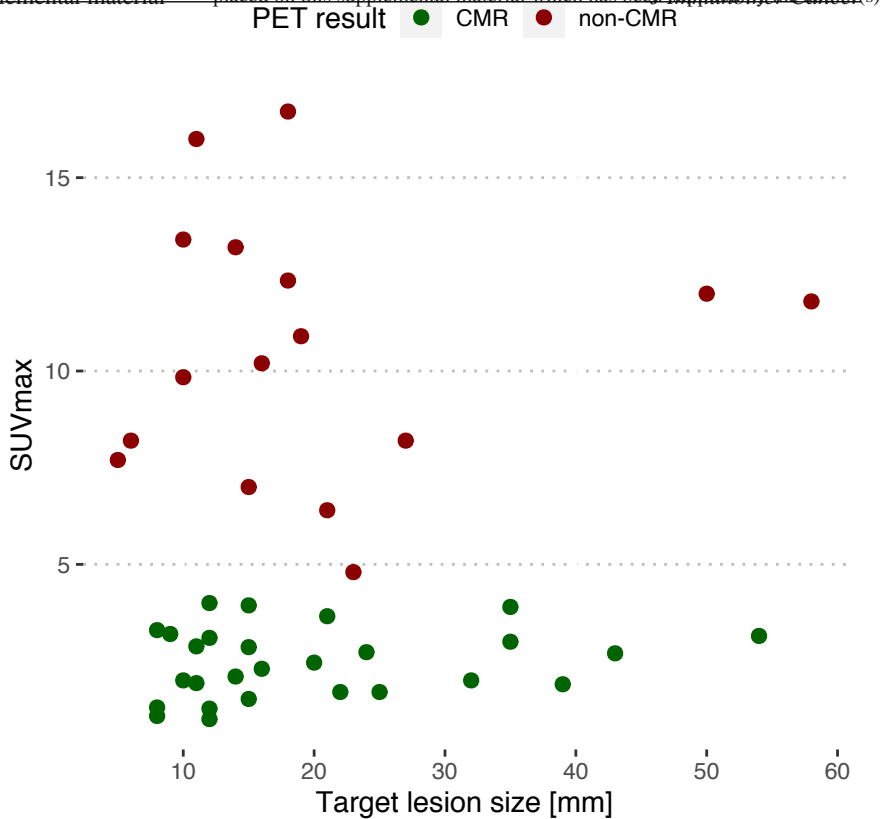

Supplement: jitc-2020-002262supp001.pdf [file jitc-2020-002262supp001.pdf]

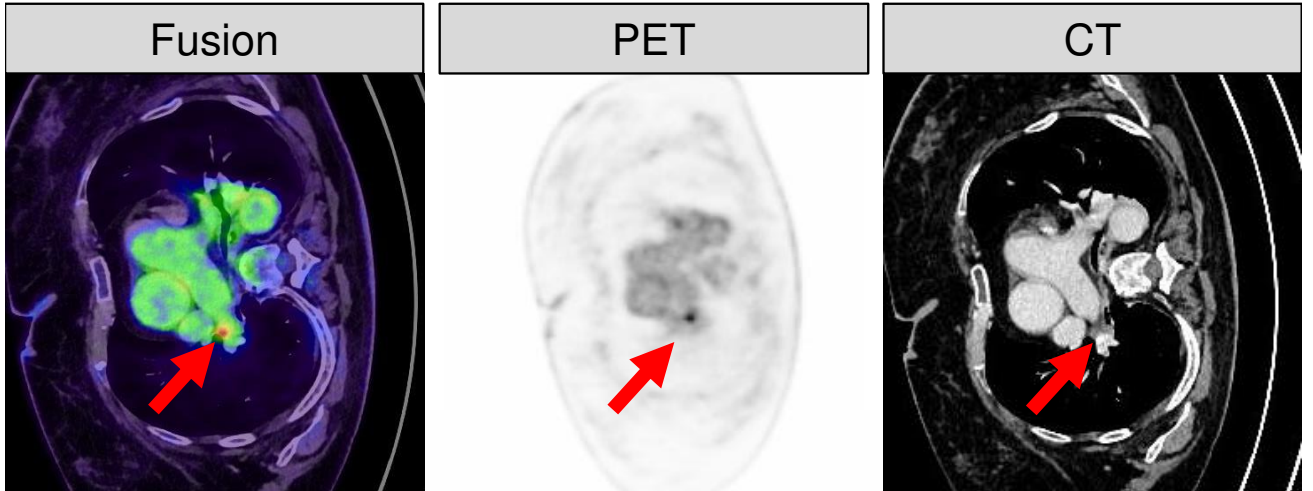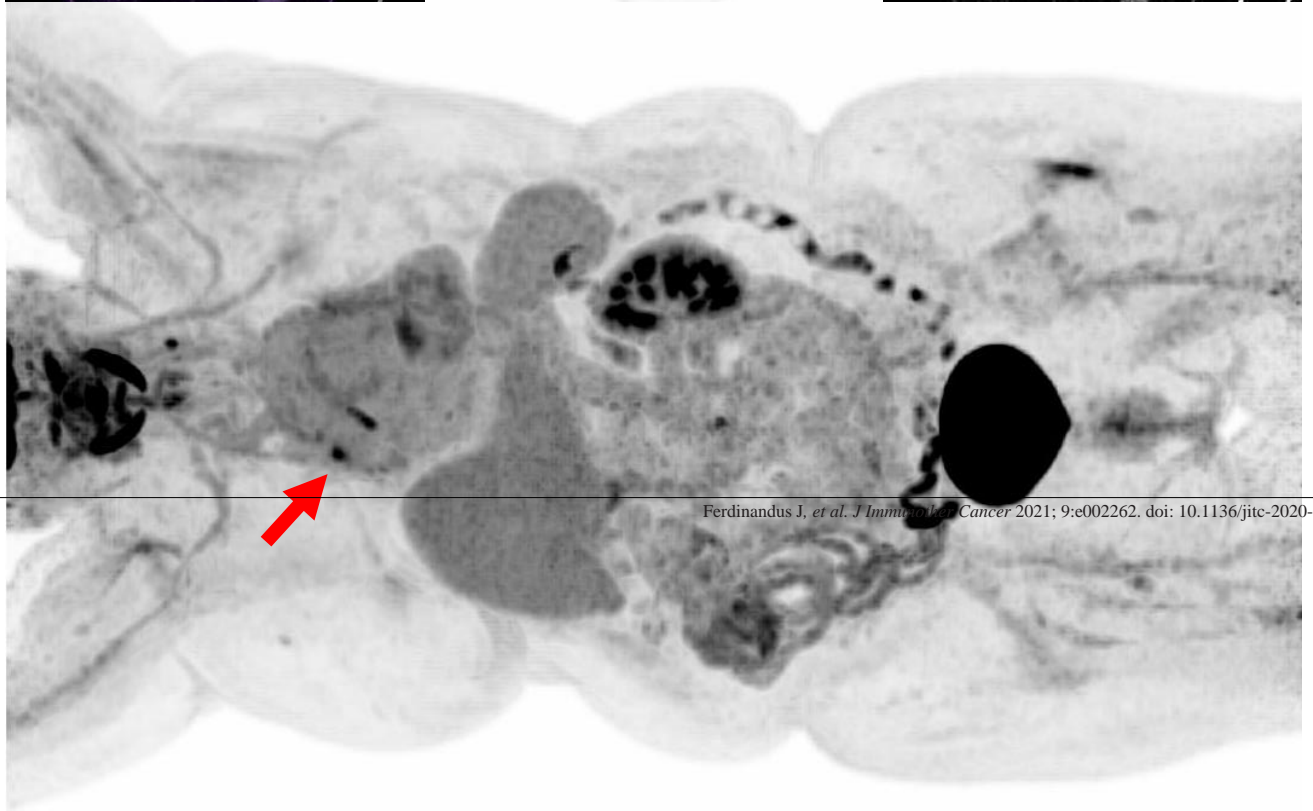

Supplement: jitc-2020-002262supp002.pdf [file jitc-2020-002262supp002.pdf]
